# Supplementary material for: Anti-smudge behavior of facilely fabricated liquid-infused surfaces with extremely low contact angle hysteresis property
Source: Royal Society of Chemistry journal article supplement (doi:10.1039/c5ra27699c), 2016-01-01
Supplement: c5ra27699c1.pdf [file c5ra27699c1.pdf]

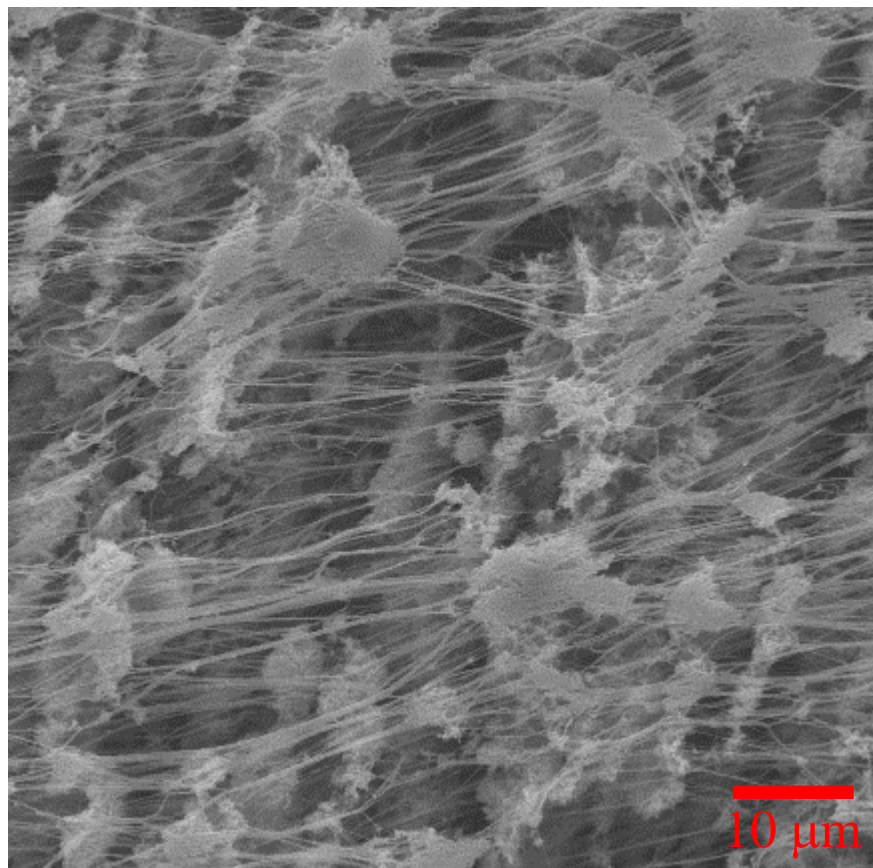

Fig. S1 The scanning electron microscopy image of stretched PTFE tape illustrates the porous structure.
